# Supplementary material for: Pseudo single lithium-ion conductors enabled by a metal–organic framework with biomimetic lithium-ion chains for lithium metal batteries
Source: Royal Society of Chemistry journal article supplement (doi:10.1039/d3qm00044c), 2023-01-01
Supplement: d3qm00044c1.pdf [file d3qm00044c1.pdf]

**Supporting Information for**

**Pseudo Single Lithium-Ion Conductors Enabled by  
Metal-Organic Framework with Biomimetic Lithium  
-Ion Chains for Lithium Metal Batteries**

Jian-Qiang Shen,<sup>a,b</sup> Ying-Li Song,<sup>a</sup> Chun-Ting He,<sup>c</sup> Chen Zhang,<sup>b</sup> Xing Lu,<sup>b</sup> Zhikai Qi,<sup>a</sup> Yunfeng Lu<sup>b,\*</sup>  
and Xian-Ming Zhang<sup>a,d,\*</sup>

<sup>a</sup>Key Laboratory of Magnetic Molecules & Magnetic Information Materials, Ministry of Education, School of Chemistry & Material Science, Shanxi Normal University, Linfen 041004, P. R. China.

<sup>b</sup>Department of Chemical and Biomolecular Engineering, University of California, Los Angeles, CA 90095, USA

<sup>c</sup>Key Laboratory of Functional Small Organic Molecule, Ministry of Education, College of Chemistry and Chemical Engineering, Jiangxi Normal University, Nanchang 330022, P. R. China.

<sup>d</sup>School of Chemistry, Taiyuan University of Technology, Taiyuan 030024, P. R. China

\*Correspondence and requests for materials should be addressed to:

Y. L. (email: [luucla@ucla.edu](mailto:luucla@ucla.edu)) and X.-M. Z. (email: [zhangxm@dns.sxnu.edu.cn](mailto:zhangxm@dns.sxnu.edu.cn))

## Supplementary Index

**Figure S1.** Structures and lithium-ion chains of  $\text{LiClO}_4 \cdot 2\text{EC}$ .

**Figure S2.** The polyhedral structure and pore structure of **808**, **808-O** and **808-LCE**.

**Figure S3.** Thermogravimetry curves of **808**, **808-OH**, **808-LCE** and **LCE@808**.

**Figure S4.** VTPXRD patterns of **808-OH**.

**Figure S5.** SEM images of **808**, **808-O** and **LCE@808**.

**Figure S6.** The calculated results of coordination modes of **808-LCE**.

**Figure S7.** Nyquist plot of **808-LCE** and **LCE@808** at 25 °C to 80 °C.

**Figure S8.** SEM images (a) **808-LCE** film and (b) **LCE@808** film.

**Figure S9.** Nyquist plot of **808-LCE** film and **LCE@808** film at 25 °C to 80 °C.

**Figure S10.** Current-time profile for  $\text{Li}|\text{MOF-based electrolytes}|\text{Li}$  cell at 20 mV of polarization.

**Figure S11.** Electrochemical impedance spectroscopy (EIS) of  $\text{LiFePO}_4|\text{Li}$  cells for **808-LCE** film and **LCE@808** film after 1 cycle and 100 cycles.

**Figure S12.** SEM images of solid electrolyte interface (SEI) on lithium metal of  $\text{LiFePO}_4|\text{Li}$  cells for **808-LCE** film and **LCE@808** film after 100 cycles.

**Table S1.** ICP-AES results.

**Table S2.** Comparison of the ionic conductivities and  $\text{Li}^+$  conductivities for various MOF-based solid electrolytes.

**Table S3.** Comparison of the ionic conductivities and  $\text{Li}^+$  conductivities for various single lithium-ion conductors.

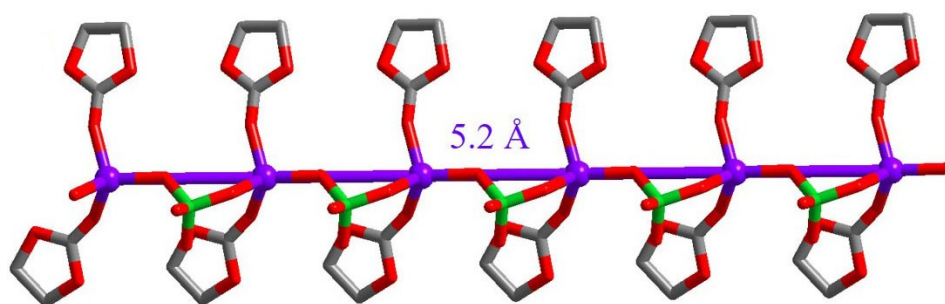

**Figure S1.** Structures and lithium ion chains of  $\text{LiClO}_4 \cdot 2\text{EC}$ .

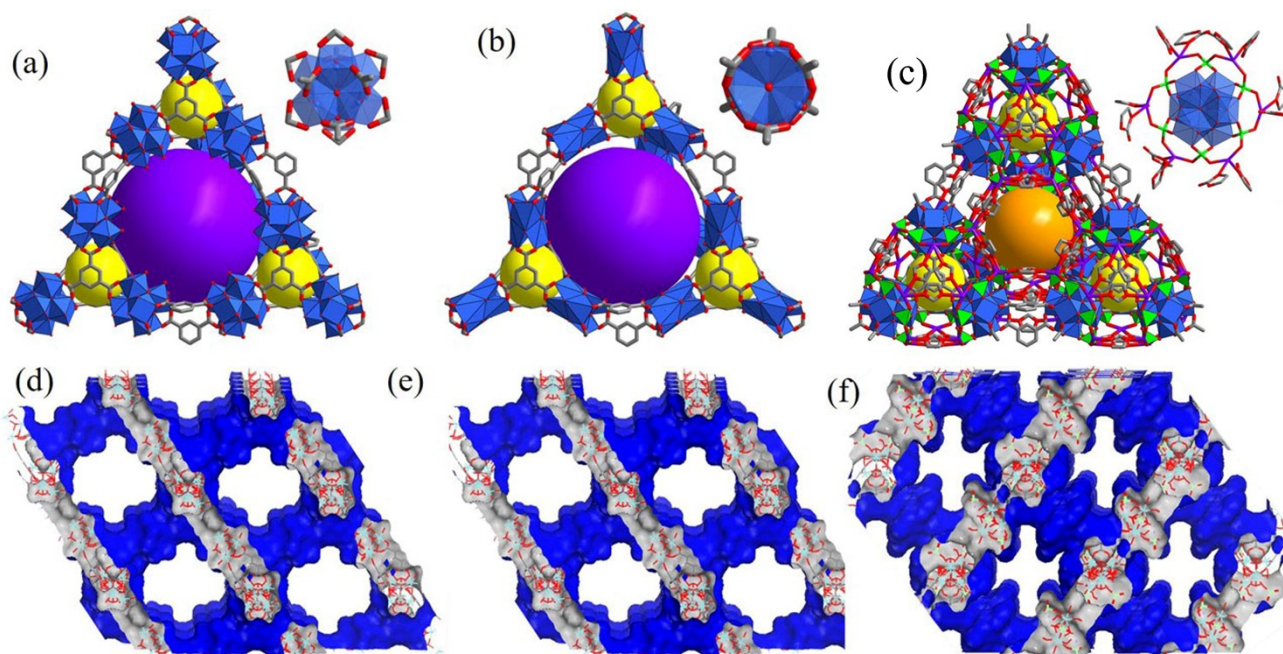

**Figure S2.** The polyhedral structure of (a) **808**, (b) **808-O** and (c) **808-LCE**; the pore structure of (d)

**808, (e) 808-O and (f) 808-LCE.**

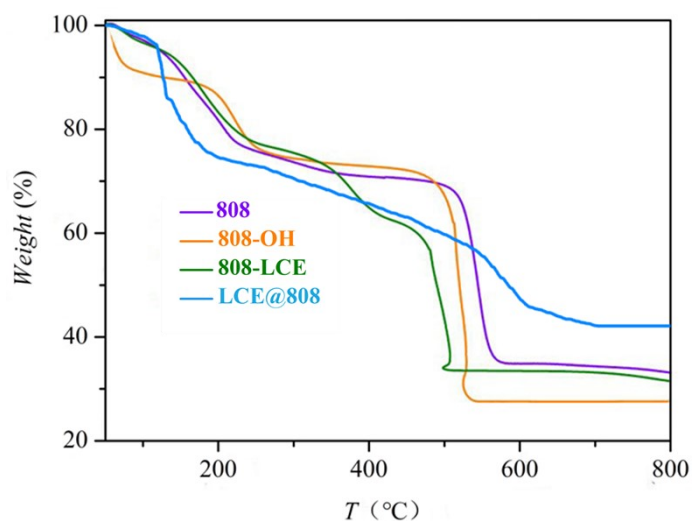

**Figure S3.** TG curves of **808**, **808-OH**, **808-LCE** and **LCE@808**.

The TG curve of **808-LCE** indicated that **LCE** can be removed above 480°C, the content of **LCE** is 43.72%, close to 44.69% in theory. The TG curve of **LCE@808** indicated that **LCE** can be removed above 400°C, the content of **LCE** is 35.72%, close to 34.41% in theory.

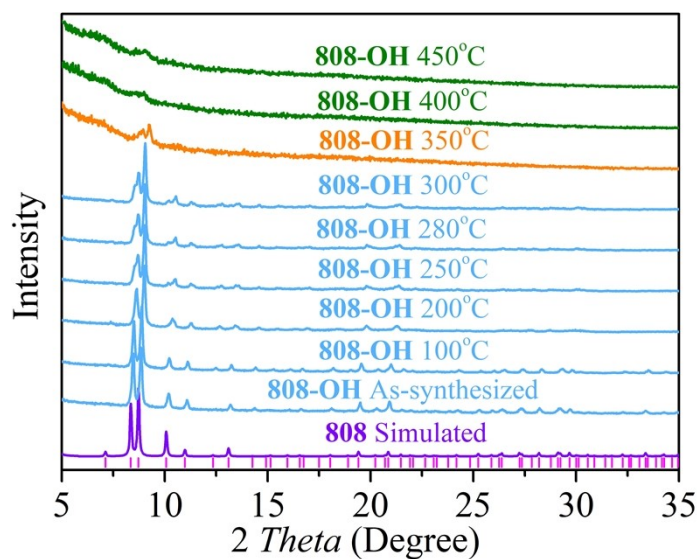

**Figure S4.** PXRD patterns of **808-OH** after heated at different temperatures under  $N_2$  for 30 min.

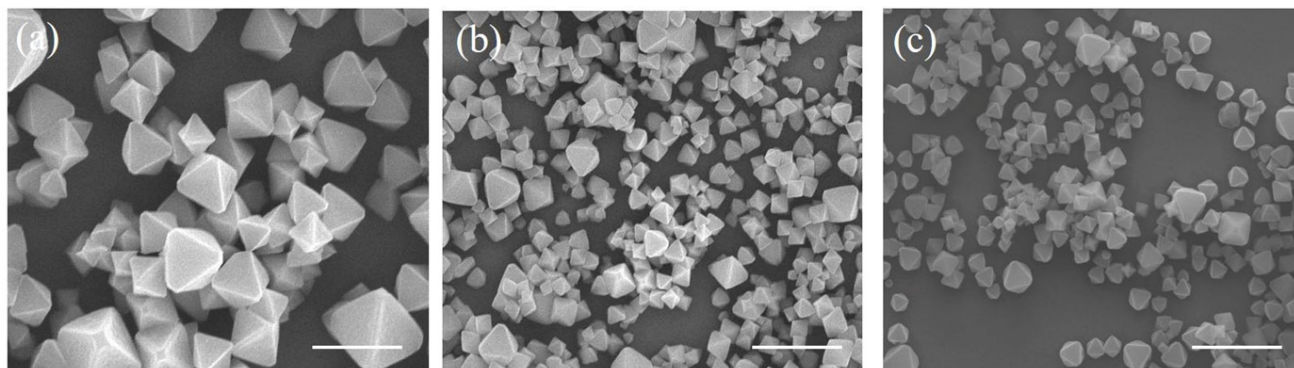

**Figure S5.** SEM images of (a) **808**, (b) **808-O** and (c) **LCE@808** (scale bar 2  $\mu\text{m}$ ).

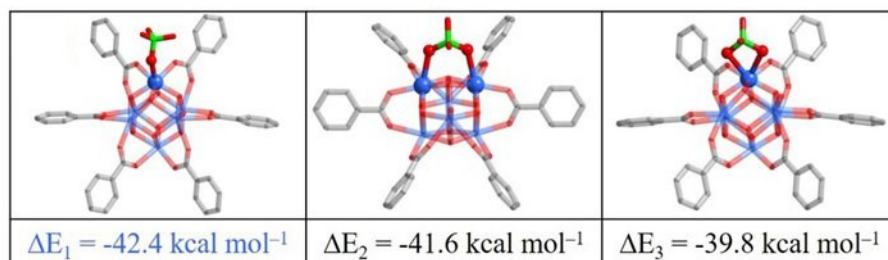

**Figure S6.** The calculated results of coordination modes of **808-LCE**.

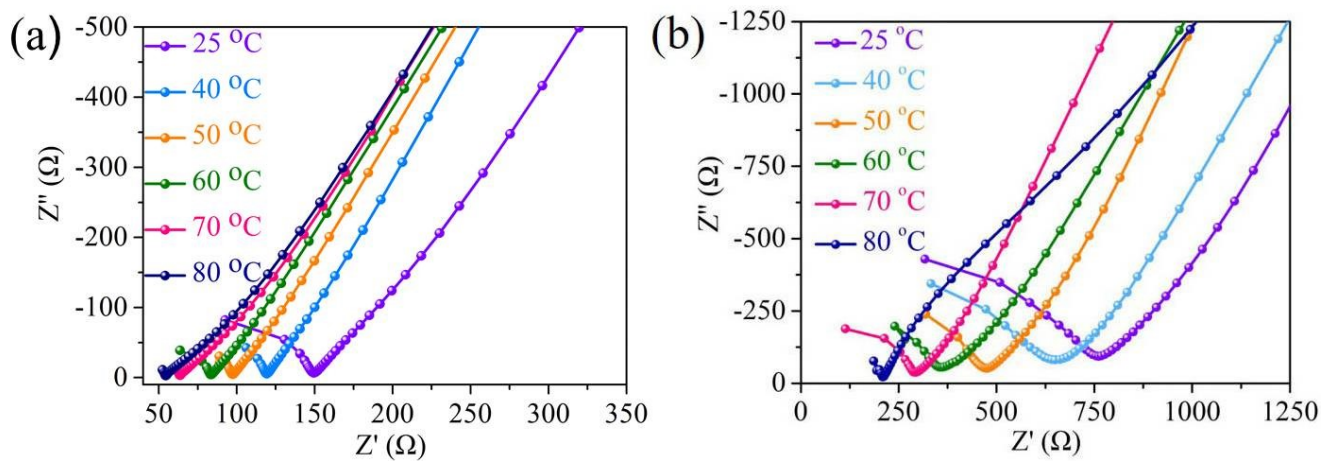

**Figure S7.** Nyquist plot of (a) **808-LCE** and (b) **LCE@808** at 25 °C to 80 °C.

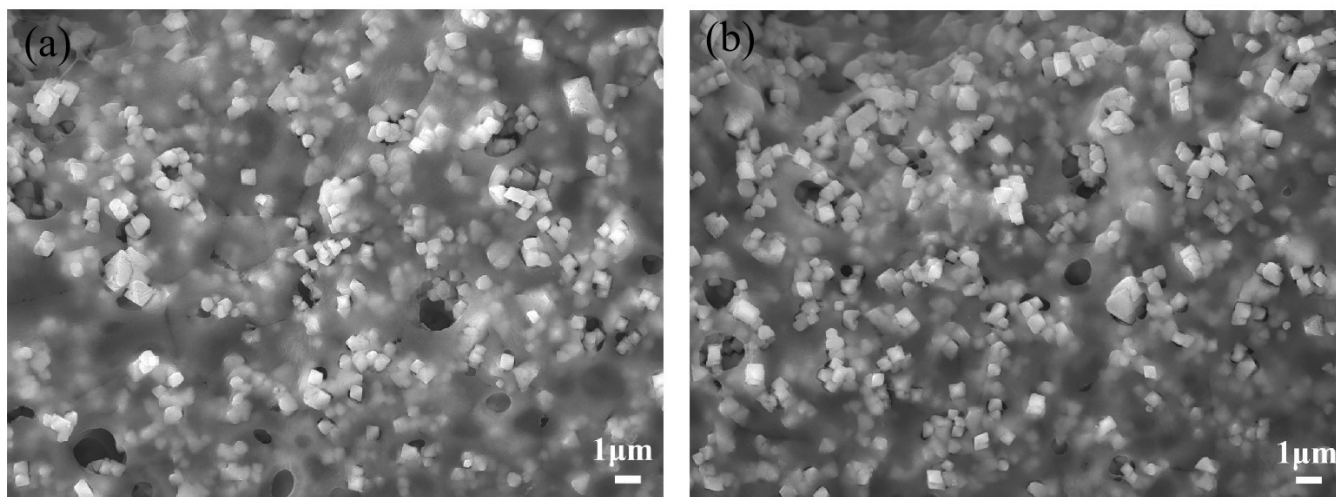

**Figure S8.** SEM images (a) **808-LCE** film and (b) **LCE@808** film.

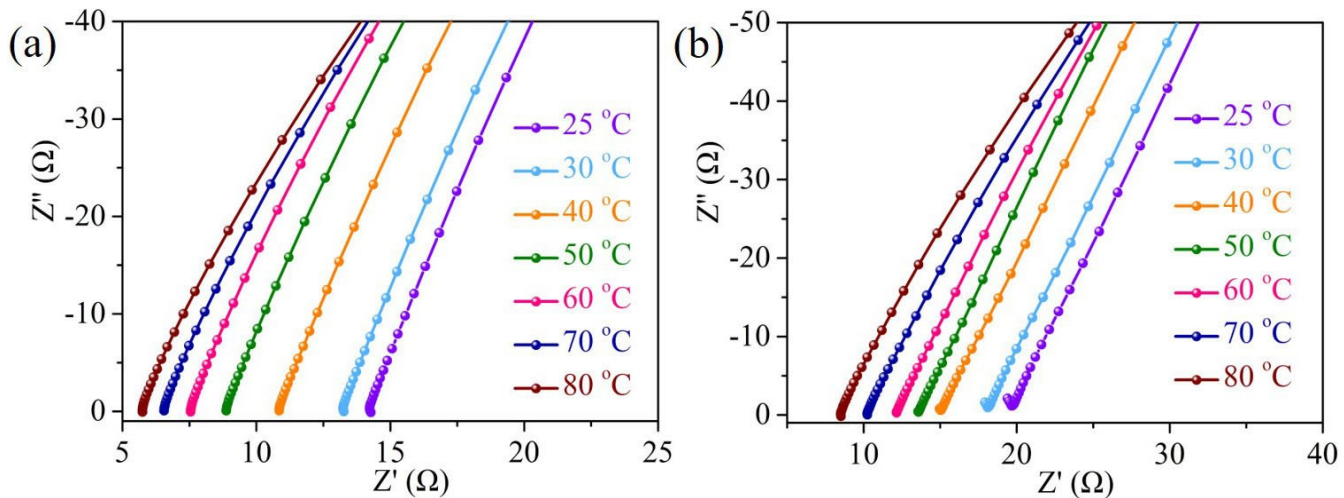

**Figure S9.** Nyquist plot of (a) **808-LCE** film and (b) **LCE@808** film between 25 °C to 80 °C.

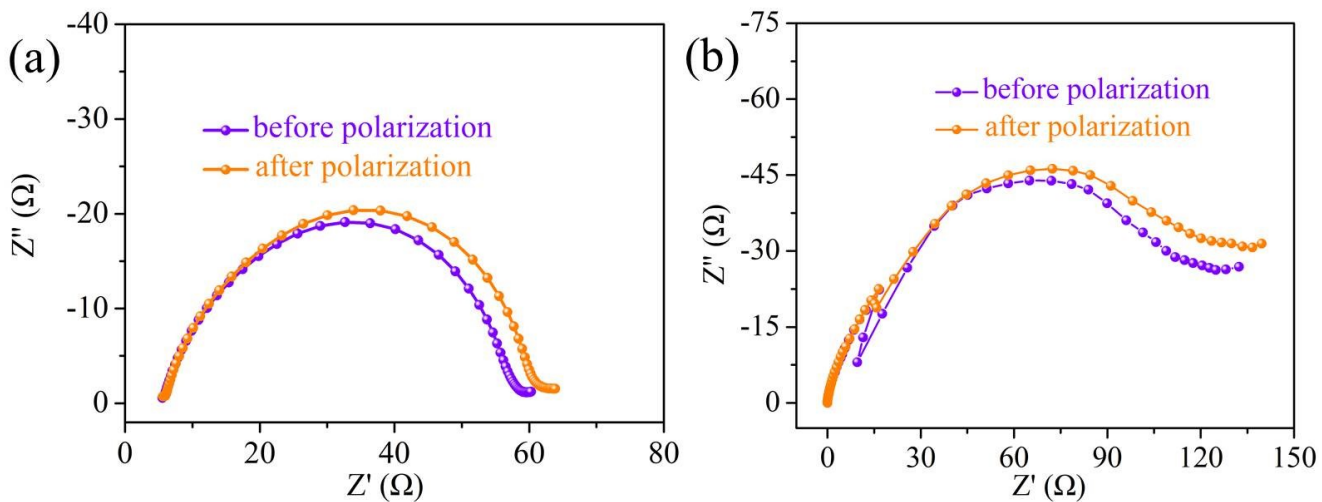

**Figure S10** Impedance spectra at initial and steady states of (a) **808-LCE** and (b) **LCE@808** for Li|MOF-SEs|Li cell at 20 mV of polarization.



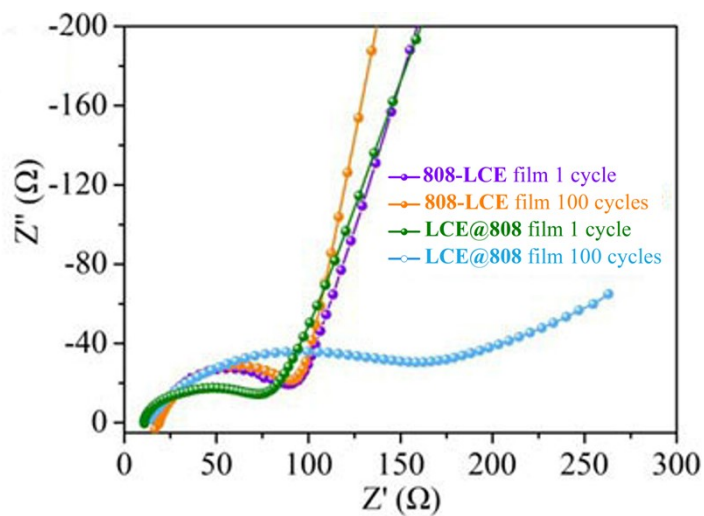

**Figure S11.** Electrochemical impedance spectroscopy (EIS) of LiFePO<sub>4</sub>|Li cells for **808-LCE** film and **LCE@808** film after 1 cycle and 100 cycles.

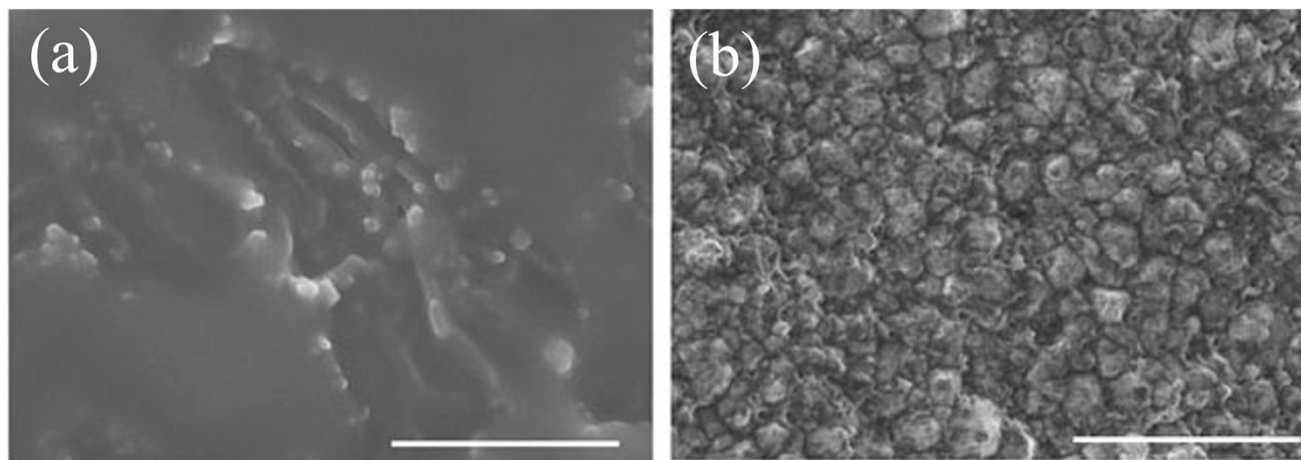

**Figure S12.** SEM images of solid electrolyte interface (SEI) on lithium metal of LiFePO<sub>4</sub>|Li cells for **808-LCE** film and **LCE@808** film after 100 cycles.

**Table S1.** ICP-AES results.

| Sample         | $W_{\text{Zr}}$ (mg L <sup>-1</sup> ) | $W_{\text{Li}}$ (mg L <sup>-1</sup> ) | $n_{\text{Zr}}$ (μmol L <sup>-1</sup> ) | $n_{\text{Li}}$ (μmol L <sup>-1</sup> ) | Zr:Li     |
|----------------|---------------------------------------|---------------------------------------|-----------------------------------------|-----------------------------------------|-----------|
| <b>808-LCE</b> | 1.50                                  | 0.113                                 | 16.42                                   | 16.29                                   | 1.0:0.99  |
| <b>LCE@808</b> | 1.67                                  | 0.131                                 | 18.31                                   | 18.97                                   | 1.00:1.04 |
| blank          | <0.01                                 | <0.01                                 | <0.01                                   | <0.01                                   | /         |

**Table S2.** Comparison of the ionic conductivities and Li<sup>+</sup> conductivities for various MOF-based solid electrolytes. The parameters better than that of **808-LCE** were highlighted in blue.

| Compound                                                              | Mobile ion                                      | Guests       | $\sigma$ (mS cm <sup>-1</sup> ) | T (°C) | t <sup>+</sup> | $\sigma_{\text{Li}^+}$ (mS cm <sup>-1</sup> ) | $E_a$ (eV) | Ref.                                                          |
|-----------------------------------------------------------------------|-------------------------------------------------|--------------|---------------------------------|--------|----------------|-----------------------------------------------|------------|---------------------------------------------------------------|
| <b>808-LCE</b>                                                        | Li <sup>+</sup>                                 | EC/DMC       | 0.55                            | 25     | 0.64           | 0.35                                          | 0.19       | <b>This Work</b>                                              |
| <b>LCE@808</b>                                                        | Li <sup>+</sup> , ClO <sub>4</sub> <sup>-</sup> | EC/DMC       | 0.48                            | 25     | 0.27           | 0.13                                          | 0.23       |                                                               |
| MIT-20-LiBF <sub>4</sub>                                              | Li <sup>+</sup> , BF <sub>4</sub> <sup>-</sup>  | PC           | 0.48                            | 25     | /              | /                                             | 0.16       | <i>J. Am. Chem. Soc.</i> <b>2017</b> , <i>139</i> , 13260.    |
| MIT-20-LiCl                                                           | Li <sup>+</sup>                                 | PC           | 0.013                           | 25     | 0.66           | 0.01                                          | 0.32       |                                                               |
| Li-CON-TFSI                                                           | Li <sup>+</sup> , TFSI <sup>-</sup>             | EtOH         | 0.057                           | 30     | /              | /                                             | 0.34       | <i>J. Am. Chem. Soc.</i> <b>2018</b> , <i>140</i> , 896.      |
| LiPF <sub>6</sub> @CD-COF-Li                                          | Li <sup>+</sup> , PF <sub>6</sub> <sup>-</sup>  | EC DMC       | 2.7                             | 30     | /              | /                                             | 0.26       | <i>Angew. Chem. Int. Ed.</i> <b>2017</b> , <i>56</i> , 16313. |
| IL@MOF-525(Cu)                                                        | Li <sup>+</sup> , TFSI <sup>-</sup>             | [EMIM][TFSI] | 3.0                             | 25     | 0.36           | /                                             | /          | <i>Adv. Mater.</i> <b>2018</b> , <i>30</i> , 1704436.         |
| LiClO <sub>4</sub> @COF-5                                             | Li <sup>+</sup> , ClO <sub>4</sub> <sup>-</sup> | THF          | 0.26                            |        | /              | /                                             | 0.037      | <i>J. Am. Chem. Soc.</i> <b>2016</b> , <i>138</i> , 9767.     |
| ICOF-2                                                                | Li <sup>+</sup>                                 | PC           | 0.031                           | 25     | 0.80           | 0.025                                         | 0.24       | <i>Angew. Chem. Int. Ed.</i> <b>2016</b> , <i>55</i> , 1737.  |
| EHU1(Sc,Li):(LiBF <sub>4</sub> )                                      | Li <sup>+</sup> , BF <sub>4</sub> <sup>-</sup>  | /            | 0.042                           | 25     | /              | /                                             | /          | <i>Chem. Mater.</i> <b>2016</b> , <i>28</i> , 2519.           |
| IL@ZIF-8                                                              | Li <sup>+</sup> , TFSA <sup>-</sup>             | [EMIM][TFSI] | /                               | /      | /              | /                                             | /          | <i>Chem. Mater.</i> <b>2015</b> , <i>27</i> , 7355.           |
| Mg <sub>2</sub> (dobdc)·0.06LiO <sup>+</sup> Pr                       | Li <sup>+</sup>                                 | EC/DEC       | 0.012                           | 25     | /              | /                                             | 0.15       | <i>J. Am. Chem. Soc.</i> <b>2011</b> , <i>133</i> , 14522.    |
| Mg <sub>2</sub> (dobdc)·0.35LiO <sup>+</sup> Pr·0.25LiBF <sub>4</sub> | Li <sup>+</sup> , BF <sub>4</sub> <sup>-</sup>  | EC/DEC       | 0.31                            | 25     | /              | /                                             | 0.15       |                                                               |

**Table S3.** Comparison of the ionic conductivities and Li<sup>+</sup> conductivities for various single lithium-ion conductors.

| Compound                                                                                   | Type of electrolytes | Mobile ion      | Guests | $\sigma$ (mS cm <sup>-1</sup> ) | T (°C) | $t^+$        | $\sigma_{\text{Li}^+}$ (mS cm <sup>-1</sup> ) | $E_a$ (eV) | Ref.                                                               |
|--------------------------------------------------------------------------------------------|----------------------|-----------------|--------|---------------------------------|--------|--------------|-----------------------------------------------|------------|--------------------------------------------------------------------|
| <b>808-LCE</b>                                                                             | MOF                  | Li <sup>+</sup> | EC/DMC | 0.55                            | 25     | 0.64         | 0.35                                          | 0.19       | <b>This Work</b>                                                   |
| MIT-20-LiCl                                                                                | MOF                  | Li <sup>+</sup> | PC     | 0.013                           | 25     | 0.66         | 0.01                                          | 0.32       | <i>J. Am. Chem. Soc.</i> <b>2017</b> , <i>139</i> , 13260.         |
| ICOF-2                                                                                     | MOF                  | Li <sup>+</sup> | PC     | 0.031                           | 25     | 0.80         | 0.025                                         | 0.24       | <i>Angew. Chem. Int. Ed.</i> <b>2016</b> , <i>55</i> , 1737.       |
| [Mg <sub>2</sub> (dobdc)]·0.06LiO <sup>i</sup> Pr                                          | MOF                  | Li <sup>+</sup> | EC/DEC | 0.012                           | 25     | /            | /                                             | 0.15       | <i>J. Am. Chem. Soc.</i> <b>2011</b> , <i>133</i> , 14522.         |
| -COCF(CF <sub>3</sub> )O(CF <sub>2</sub> ) <sub>2</sub> SO <sub>2</sub> N <sup>(-)</sup> - | Blend polymer        | Li <sup>+</sup> | NA     | Ca. 0.01                        | 30     | 0.71 (25 °C) | 0.007                                         | /          | <i>Electrochim. Acta</i> , <b>2013</b> , <i>93</i> , 254.          |
| -SO <sub>2</sub> N <sup>(-)</sup> SO <sub>2</sub> CF <sub>3</sub>                          | Blend polymer        | Li <sup>+</sup> | NA     | Ca. 10 <sup>-3</sup>            | 60     | 0.92         | 9.2×10 <sup>-3</sup>                          | /          | <i>Electrochim. Acta</i> , <b>2001</b> , <i>46</i> , 1487.         |
| -SO <sub>2</sub> N <sup>(-)</sup> SO <sub>2</sub> CF <sub>3</sub>                          | Random copolymer     | Li <sup>+</sup> | NA     | 0.1                             | 60     | 0.93         | 0.093                                         | /          |                                                                    |
| -SO <sub>2</sub> N <sup>(-)</sup> SO(=NSO <sub>2</sub> CF <sub>3</sub> )CF <sub>3</sub>    | Blend polymer        | Li <sup>+</sup> | NA     | 0.01                            | 60     | 0.91         | 0.009                                         | /          | <i>Angew. Chem. Int. Ed.</i> <b>2016</b> , <i>55</i> , 2521.       |
| -SO <sub>2</sub> N <sup>(-)</sup> SO <sub>2</sub> CF <sub>3</sub>                          | Blend polymer        | Li <sup>+</sup> | NA     | 0.01                            | 60     | 0.90         | 0.009                                         | /          | <i>RSC Adv.</i> <b>2016</b> , <i>6</i> , 32454.                    |
| -SO <sub>2</sub> N <sup>(-)</sup> SO <sub>2</sub> CF <sub>3</sub>                          | Triblock polymer     | Li <sup>+</sup> | NA     | 0.013                           | 60     | 0.85 (90 °C) | 0.011                                         | /          | <i>Nat. Mater.</i> <b>2013</b> , <i>12</i> , 452.                  |
| -SO <sub>2</sub> N <sup>(-)</sup> SO <sub>2</sub> CF <sub>3</sub>                          | Block polymer        | Li <sup>+</sup> | NA     | 0.01                            | 70     | 0.83         | 8.3×10 <sup>-3</sup>                          | /          | <i>ACS Appl. Mater. Interfaces</i> <b>2016</b> , <i>8</i> , 10350. |
